# Supplementary material for: Depth-resolved particle-associated microbial respiration in the northeastAtlantic
Source: Copernicus journal article supplement (doi:10.5194/bg-13-4927-2016), 2016-09-07
Supplement: Supplementary file 1 [file bg-13-4927-2016-supplement.zip]

1    **Supplementary Material**

2    **Figure S1: Example light microscope image of a phytodetrital aggregate collected from depth. Scale bar=0.5 mm.**

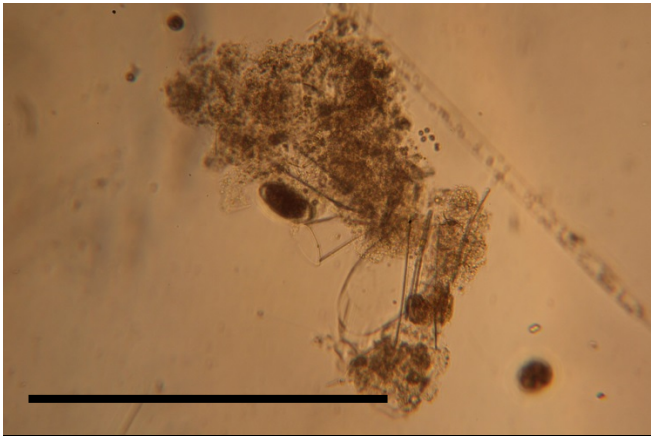

3  
4    **Table S1: Particulate organic carbon (POC) content of marine snow aggregates (PA). PA were grouped into size classes for bulk**  
5    **carbon measurement (see methods). ND=No Data**

6

| <i>Size range (ESD, mm)</i>    | <i>Aggregate POC (µg C mm<sup>-3</sup>)</i> |                |
|--------------------------------|---------------------------------------------|----------------|
|                                | <i>&lt;0.6</i>                              | <i>&gt;0.6</i> |
| <i><b>Sample Depth (m)</b></i> |                                             |                |
| 36                             | 17.0                                        | 6.7            |
| 46                             | 30.6                                        | 11.0           |
| 73                             | 15.0                                        | 8.9            |
| 113                            | 16.5                                        | 9.4            |
| 128                            | 11.7                                        | ND             |
| 204                            | 14.2                                        | ND             |
| 500                            | ND                                          | ND             |
