# Supplementary material for: Depth-resolved particle-associated microbial respiration in the northeastAtlantic
Source: Copernicus journal article supplement (doi:10.5194/bg-13-4927-2016), 2016-09-07
Supplement: Supplementary file 2 [file bg-13-4927-2016-supplement.zip]

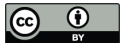

## *Supplement of*

# **Depth-resolved particle-associated microbial respiration in the northeast Atlantic**

**Anna Belcher et al.**

*Correspondence to:* A. Belcher ([a.belcher@noc.soton.ac.uk](mailto:a.belcher@noc.soton.ac.uk))

- [bg-13-4927-2016-supplement-title-page.pdf](#)
- [Belcher et al. 2016\\_supplementary data\\_v2.xlsx](#)
- [bg-2016-130-supplement-version5.pdf](#)

The copyright of individual parts of the supplement might differ from the CC-BY 3.0 licence.
